# Supplementary material
Source: publisher figshare collection journal article supplement (https://acs.figshare.com/ndownloader/files/3776173)
Supplement: Supplementary file 1 [file 3776173]

***SUPPORTING INFO***

# Photo-patternable ‘Clickable’ Hydrogels: ‘Orthogonal’ Control over Fabrication and Functionalization

*Sadik Kaga,<sup>a</sup> Serap Yapar,<sup>a</sup> Ece Manavoglu Gecici,<sup>a</sup> and Rana Sanyal<sup>a,b\*</sup>*

<sup>a</sup>Bogazici University, Department of Chemistry, Bebek, 34342, Istanbul, Turkey.

<sup>b</sup>Bogazici University, Center for Life Sciences and Technologies, Istanbul, Turkey.

\* Corresponding Author. E-mail: [rana.sanyal@boun.edu.tr](mailto:rana.sanyal@boun.edu.tr) Tel: +90(212)3594793, Fax: +90(212)2872467.

## INDEX

| Figure Title                                                                                                                                                                                | Page |
|---------------------------------------------------------------------------------------------------------------------------------------------------------------------------------------------|------|
| <b>Figure S1.</b> FTIR spectra of (a) PEG6K bisazide <b>5</b> (b) PEG-dendron copolymer <b>9</b> (c) Functionalized copolymer <b>16</b> (d) Functional <b>6KG3<sub>(1:1)</sub></b> hydrogel | 3    |
| <b>Figure S2.</b> Representative fluorescence microscopy images of cross sectional profile of hydrogels after FITC-streptavidin functionalization.                                          | 3    |
| <b>Figure S3.</b> SEM images of patterned. hydrogel G36K <sub>(1:1)</sub> by PDMS molding                                                                                                   | 4    |
| <b>Figure S4.</b> SEM images of patterned. hydrogel G36K <sub>(1:1)</sub> by photopatterning                                                                                                | 4    |
| <b>Figure S5.</b> <sup>1</sup> H NMR spectrum of copolymer <b>10</b> ( <i>alkene: alkyne</i> = 2:1)                                                                                         | 5    |
| <b>Figure S6.</b> <sup>1</sup> H NMR spectrum of copolymer <b>11</b> ( <i>alkene: alkyne</i> = 1:1)                                                                                         | 5    |
| <b>Figure S7.</b> <sup>1</sup> H NMR spectrum of copolymer <b>12</b> ( <i>alkene: alkyne</i> = 1:2)                                                                                         | 6    |
| <b>Figure S8.</b> <sup>1</sup> H NMR spectrum of copolymer <b>13</b> ( <i>alkene: alkyne</i> = 1:1)                                                                                         | 6    |
| <b>Figure S9.</b> <sup>1</sup> H NMR spectrum of copolymer <b>14</b> ( <i>alkene: alkyne</i> = 1:1)                                                                                         | 7    |
| <b>Figure S10.</b> <sup>1</sup> H NMR spectrum of copolymer <b>15</b> ( <i>alkene: alkyne</i> = 2:1)                                                                                        | 7    |
| <b>Figure S11.</b> <sup>1</sup> H NMR spectrum of copolymer <b>16</b> ( <i>alkene: alkyne</i> = 1:1)                                                                                        | 8    |
| <b>Figure S12.</b> <sup>1</sup> H NMR spectrum of copolymer <b>17</b> ( <i>alkene: alkyne</i> = 1:2)                                                                                        | 8    |
| <b>Figure S13.</b> <sup>1</sup> H NMR spectrum of copolymer <b>18</b> ( <i>alkene: alkyne</i> = 1:3)                                                                                        | 9    |
| <b>Figure S14</b> Evolution of moduli with gelation time                                                                                                                                    | 9    |
| <b>Figure S15</b> Water uptake comparison of hydrogels synthesized with or without NVP                                                                                                      | 10   |
| <b>Table S1</b> Calculation of Biotin-azide conjugation conversion                                                                                                                          | 10   |

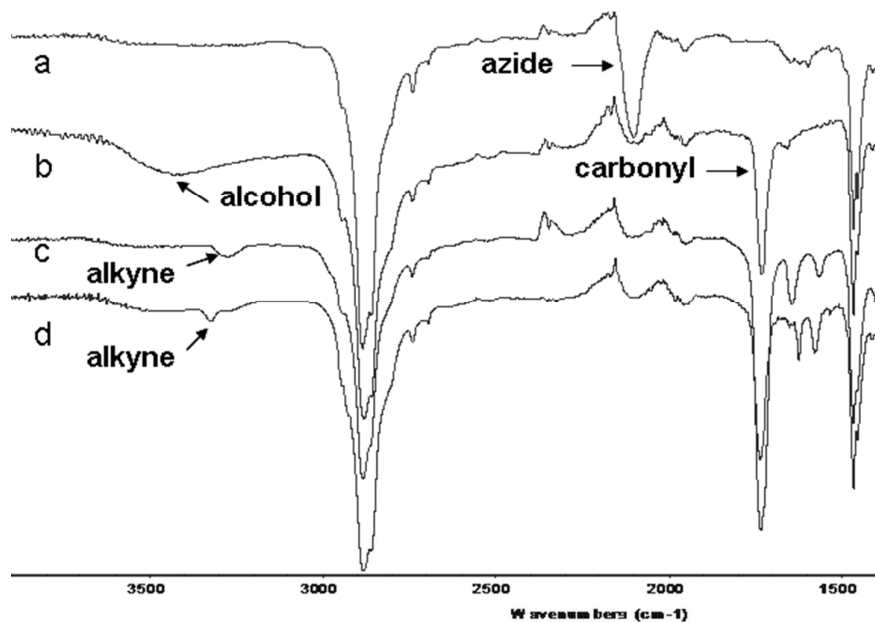

**Figure S1.** FTIR spectra of (a) PEG6K bisazide **5** (b) PEG-dendron copolymer **9** (c) Functionalized copolymer **16** (d) Functional **6KG3**<sub>(1:1)</sub> hydrogel

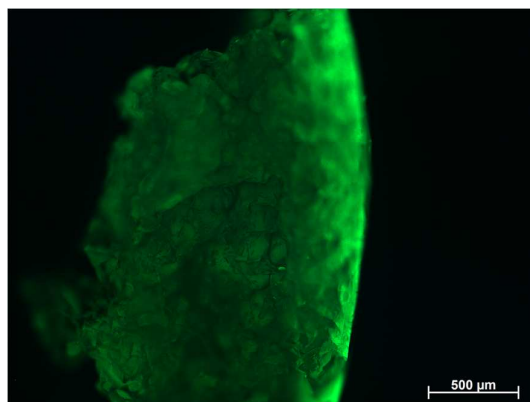

**Figure S2.** Representative fluorescence microscopy images of cross sectional profile of hydrogels after FITC-streptavidin functionalization.

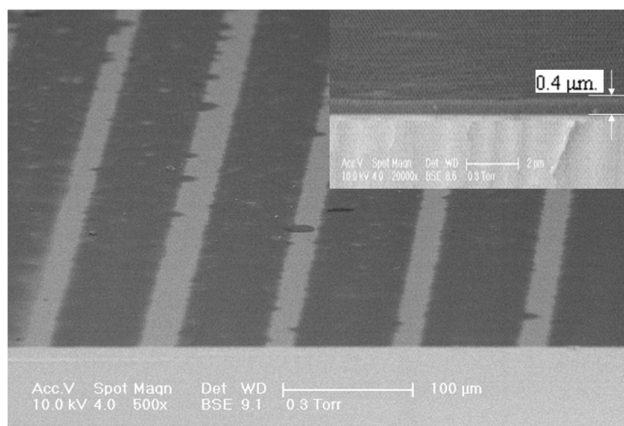

**Figure S3.** SEM images of patterned. hydrogel G36K<sub>(1:1)</sub> by PDMS molding

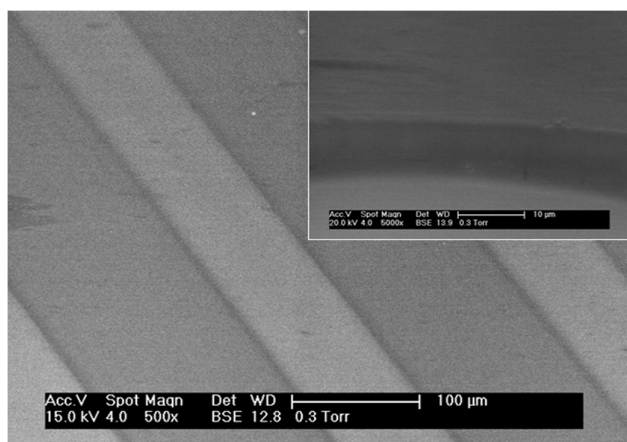

**Figure S4.** SEM images of patterned. hydrogel G36K<sub>(1:1)</sub> by photopatterning.

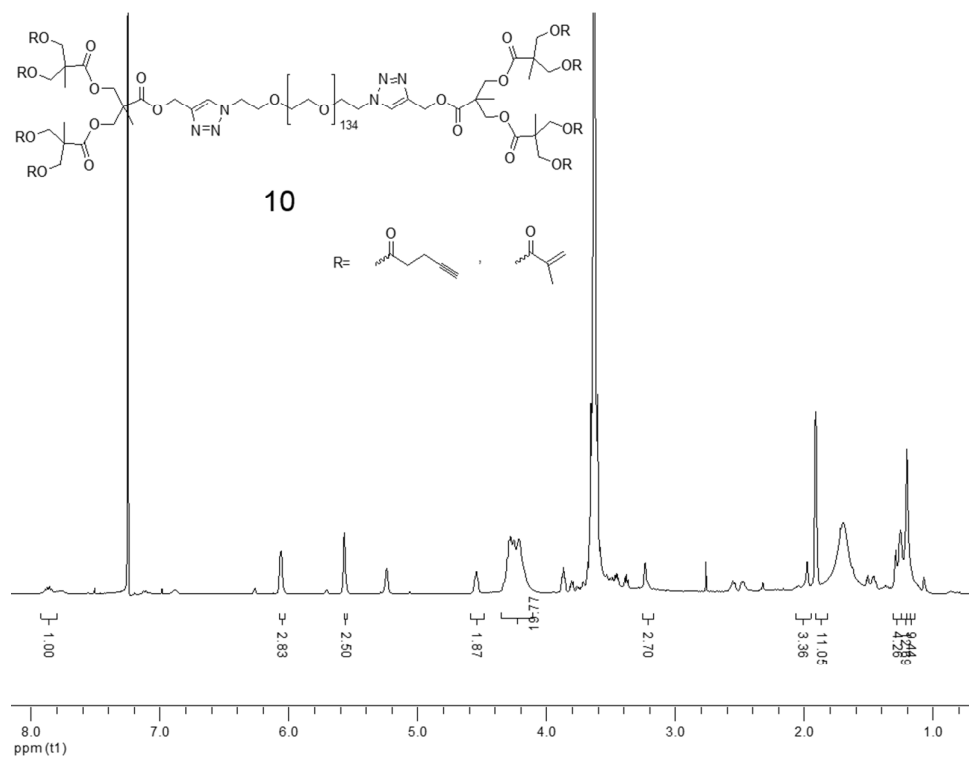

**Figure S5.** <sup>1</sup>H NMR spectrum of copolymer **10** (*alkene: alkyne* = 2:1)

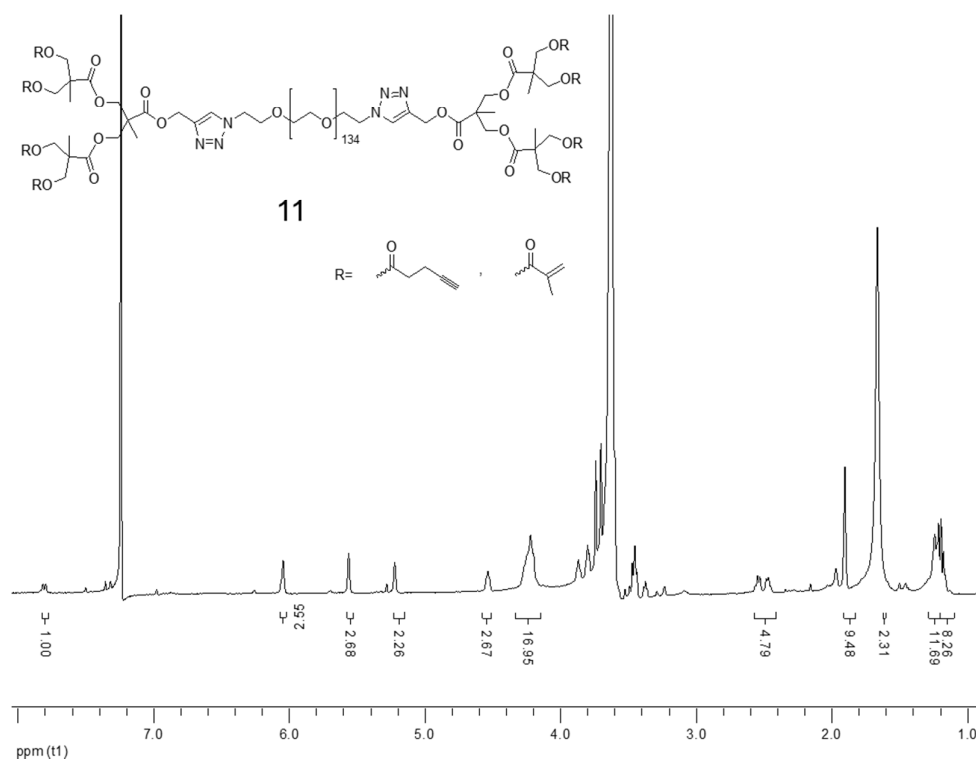

**Figure S6.** <sup>1</sup>H NMR spectrum of copolymer **11** (*alkene: alkyne* = 1:1)

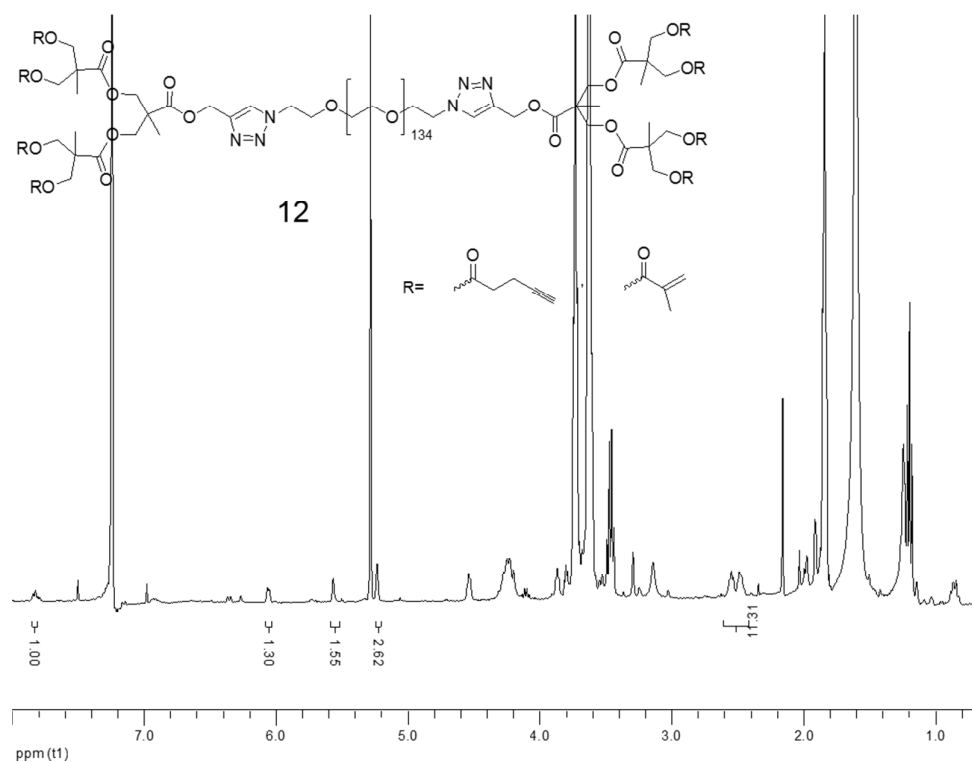

**Figure S7.**  $^1\text{H}$  NMR spectrum of copolymer **12** (alkene: alkyne = 1:2)

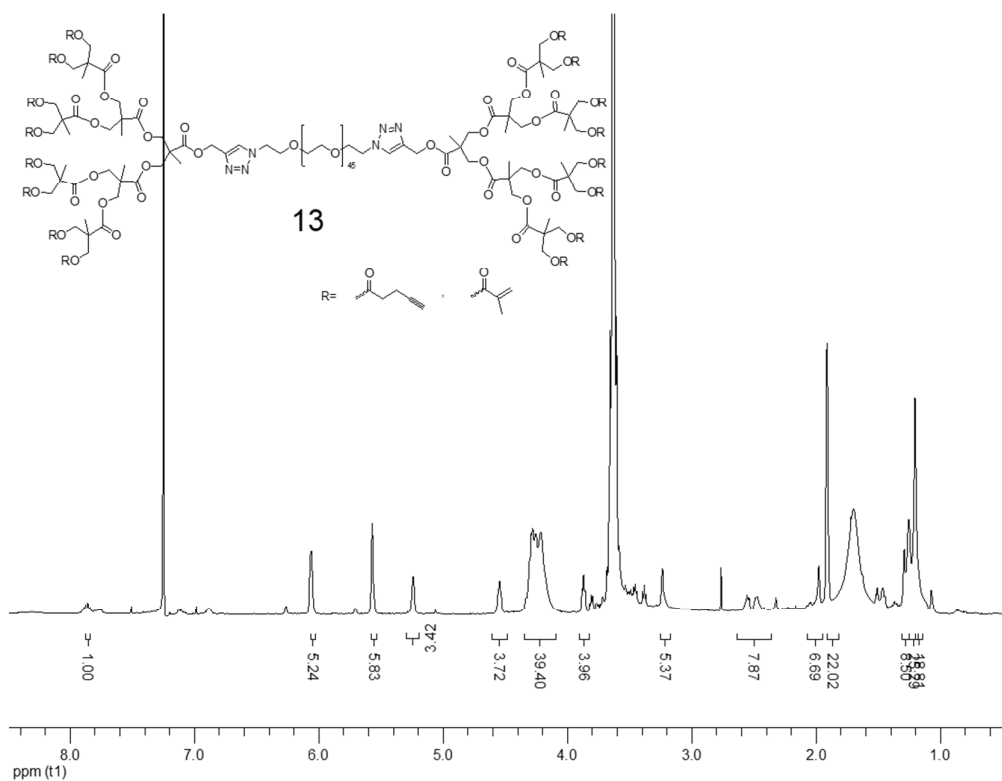

**Figure S8.**  $^1\text{H}$  NMR spectrum of copolymer **13** (alkene: alkyne = 1:1)

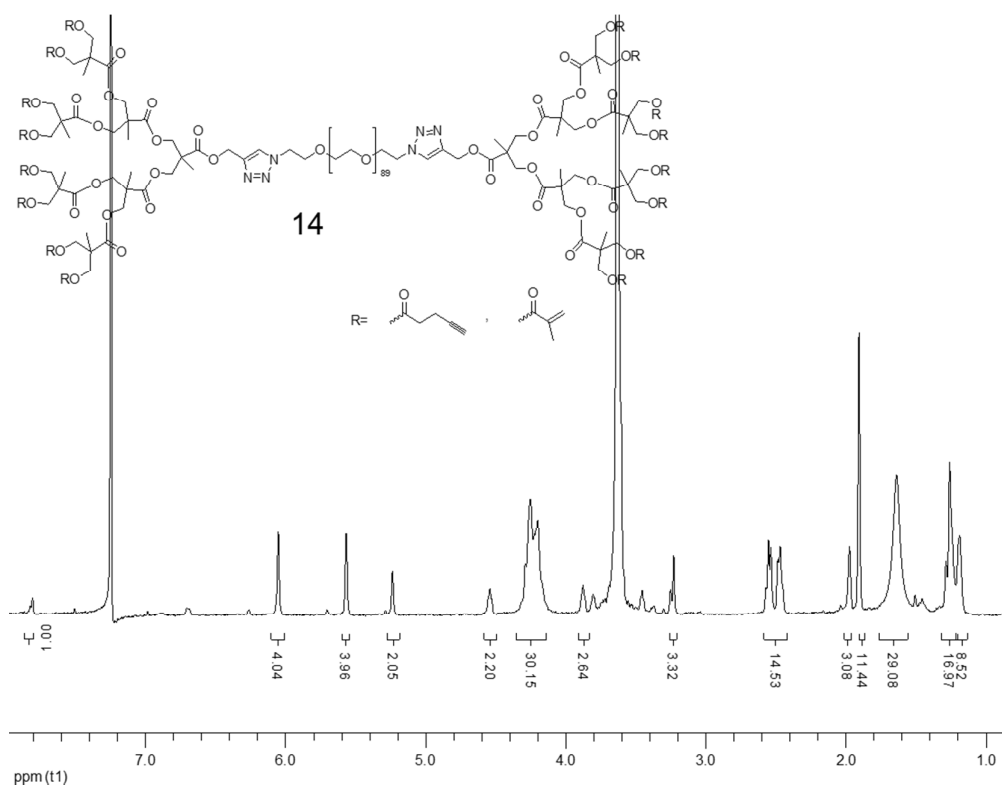

**Figure S9.** <sup>1</sup>H NMR spectrum of copolymer **14** (alkene: alkyne = 1:1)

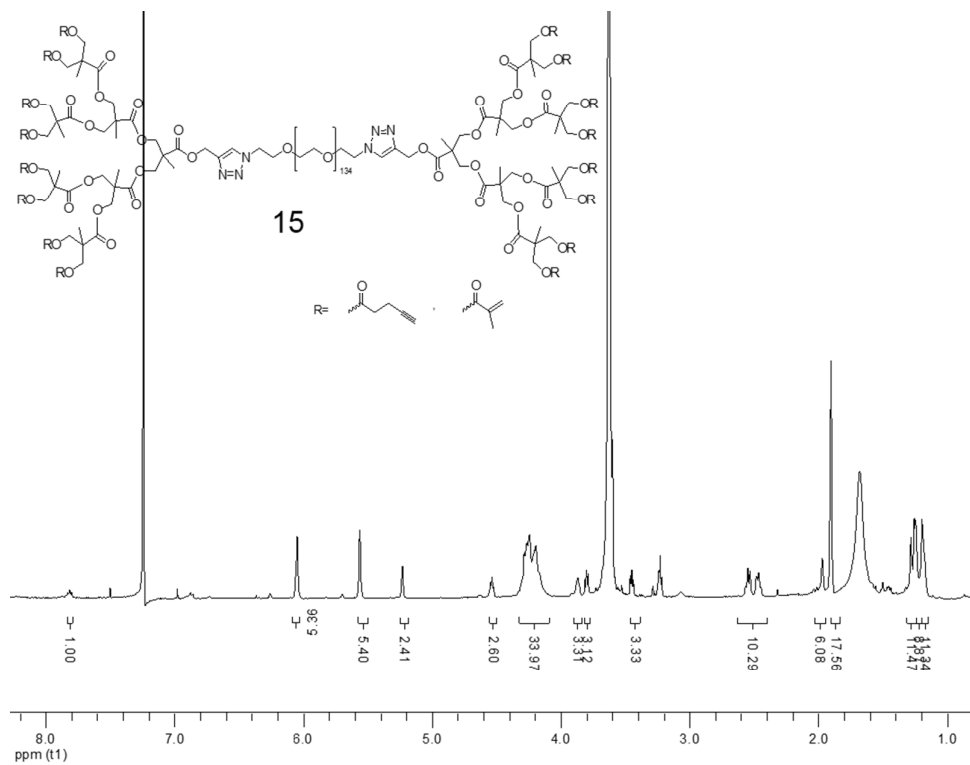

**Figure S10.** <sup>1</sup>H NMR spectrum of copolymer **15** (alkene: alkyne = 2:1)

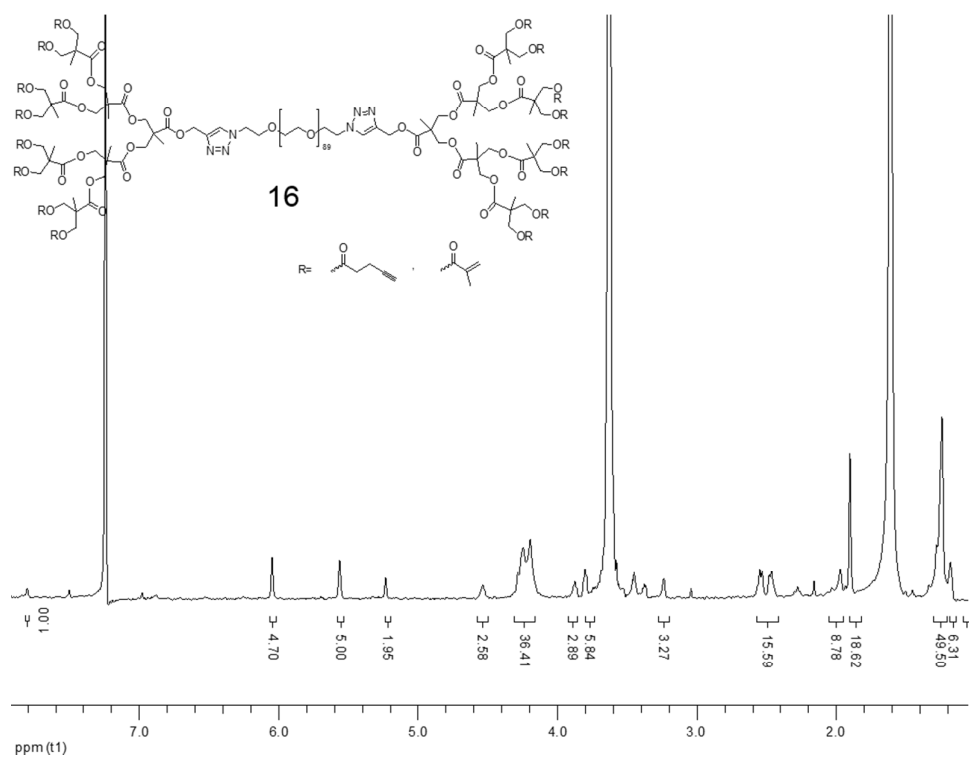

**Figure S11.**  $^1\text{H}$  NMR spectrum of copolymer **16** (*alkene: alkyne* = 1:1)

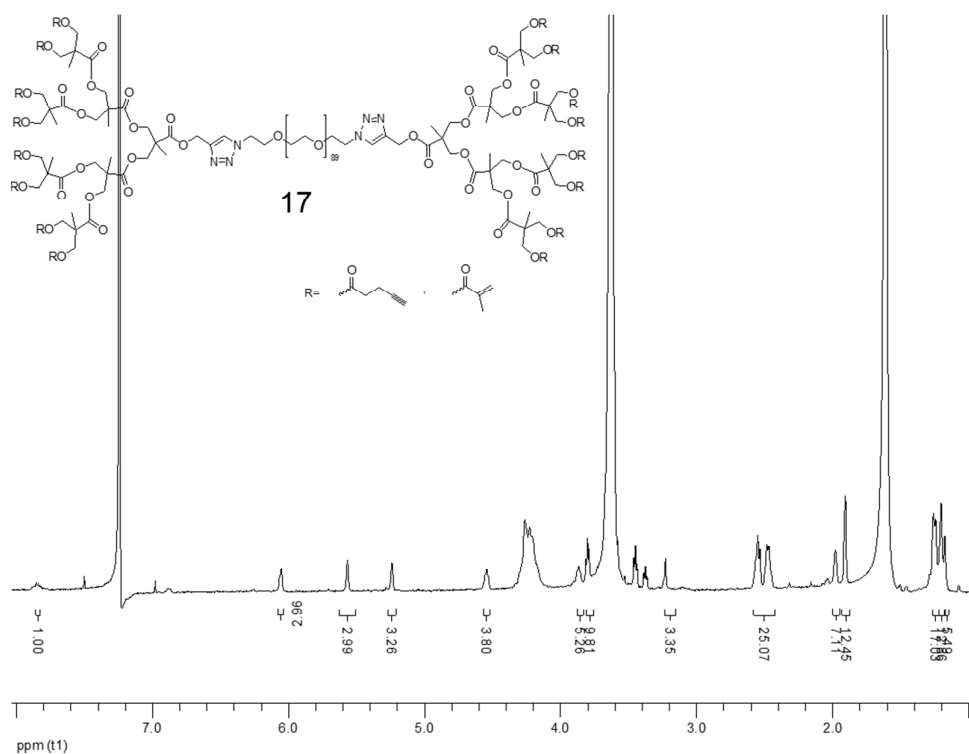

**Figure S12.**  $^1\text{H}$  NMR spectrum of copolymer **17** (*alkene: alkyne* = 1:2)



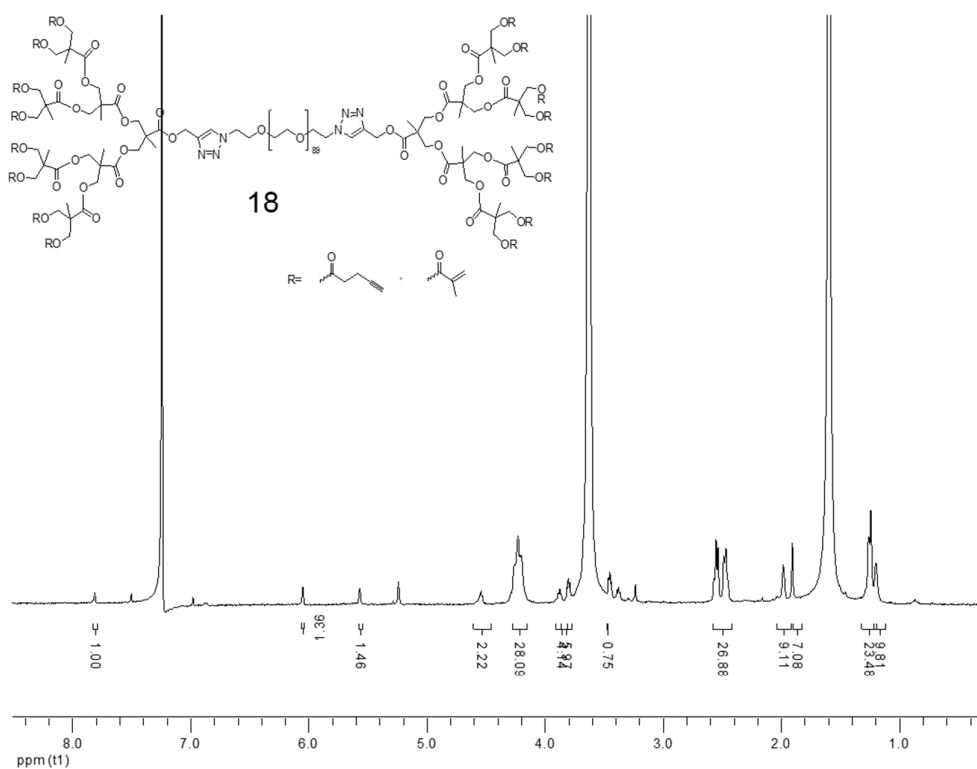

**Figure S13.**  $^1\text{H}$  NMR spectrum of copolymer **18** (alkene: alkyne = 1:3)

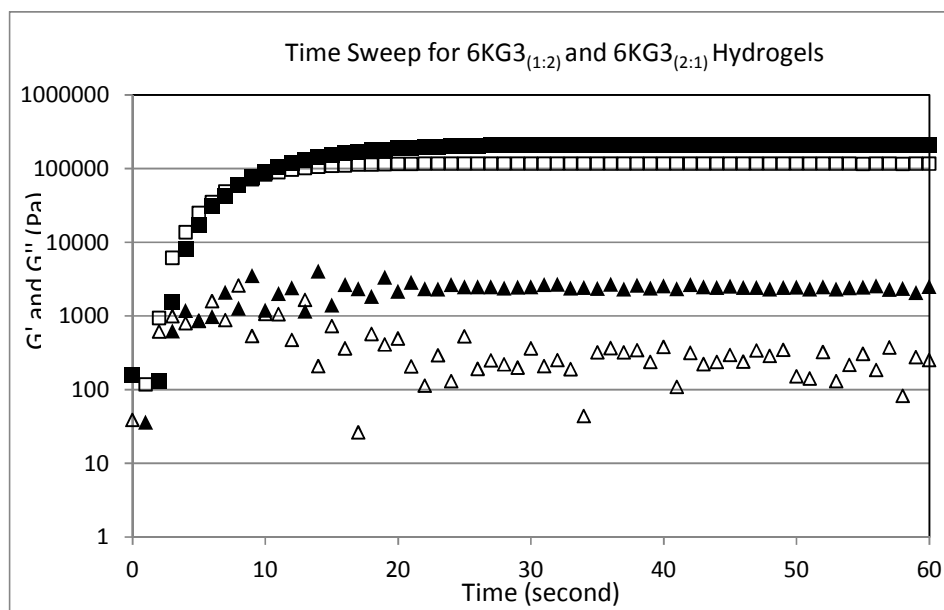

**Figure S14:** Evolution of moduli with gelation time for 6KG3(1:2) and 6KG3(2:1) Hydrogels. □ ( $G'$ ), Δ ( $G''$ ) for 6KG3<sub>(1:2)</sub>; ■ ( $G'$ ), ▲ ( $G''$ ) for 6KG3<sub>(2:1)</sub> during gelation under UV light (4 watt).

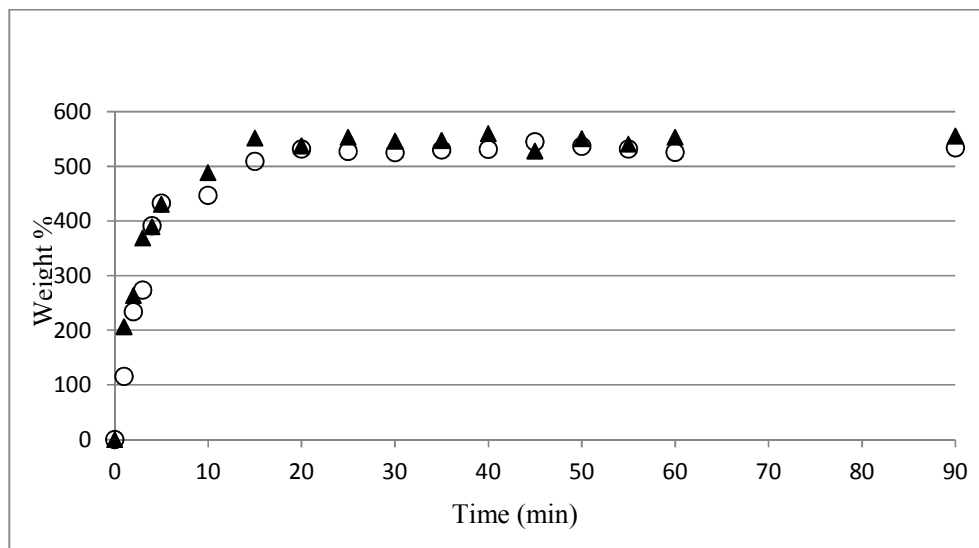

**Figure S15.** Water uptake comparison of hydrogels synthesized with or without NVP : (▲) **6KG3<sub>(1:3)</sub>with NVP**, (○) **6KG3<sub>(1:3)</sub> without NVP**

**Conversion of Biotin Azide Conjugation.** N% ratios of all the hydrogel samples were measured by elemental analyzer before and after biotin azide conjugation. Obtained N% values of hydrogels before functionalization with biotin azide belongs to the triazole units between dendrons and PEG chain, and the N-atom of N-vinylpyrrolidone (NVP). The addition degrees of NVP to one dendron polymer dendron conjugate was found by comparing with theoretical N% values for each NVP addition. Obtained N% values of hydrogels after functionalization with biotin azide include also the newly formed triazole units and N-atoms of biotin. Biotin azide conversion values were found by comparison with theoretical N% values for each biotin azide conjugation to one dendron-polymer conjugate containing an NVP unit.

**Table S1.** Biotin-azide conversion and no. of N-atoms (from biotin-azide) after conjugation

|                                                                 | <b>6KG3<sub>(2:1)</sub></b> | <b>6KG3<sub>(1:1)</sub></b> | <b>6KG3<sub>(1:2)</sub></b> | <b>6KG3<sub>(1:3)</sub></b> |
|-----------------------------------------------------------------|-----------------------------|-----------------------------|-----------------------------|-----------------------------|
| <b>(N%) Before Biotin-N<sub>3</sub> Conjugation<sup>a</sup></b> | 2.7660                      | 2.7378                      | 2.8816                      | 2.7325                      |
| <b>(N%) After Biotin-N<sub>3</sub> Conjugation<sup>a</sup></b>  | 4.9576                      | 5.2948                      | 5.9836                      | 6.9956                      |
| <b>No. of N atoms (from Biotin-N<sub>3</sub>)</b>               | 20                          | 23                          | 30                          | 42                          |
| <b>Biotin-N<sub>3</sub> Conjugation (%)</b>                     | 75.05                       | 57.50                       | 56.29                       | 70.00                       |

<sup>a</sup> measured using CHNS elemental analyzer.
